# Supplementary material for: Influence of oxygen exposure on fermentation process and sensory qualities of Sichuan pickle (paocai)
Source: PubMed Central journal article supplement — RSC Adv. 2019 Nov 26;9(66):38520–30. doi: 10.1039/c9ra05994f (PMC9075915; doi:10.1039/c9ra05994f), 2019-11-26

|    |         |                                                  |      |      |      |      |      |       |      |      |      |       |       |      |      |      |       |      |
|----|---------|--------------------------------------------------|------|------|------|------|------|-------|------|------|------|-------|-------|------|------|------|-------|------|
| 54 |         | 2-Ethylhexanol                                   | nd   | nd   | nd   | 2.27 | nd   | nd    | nd   | nd   | nd   | nd    | nd    | nd   | nd   | nd   | nd    | nd   |
| 55 | Ketones | 2,3-HEPTANEDIONE                                 | 0.68 | 0.73 | 0.46 | 1.31 | 0.42 | nd    | nd   | 0.65 | 0.47 | 0.63  | 0.41  | 0.36 | 1.01 | 0.35 | nd    | nd   |
| 56 |         | 3-Hexanone                                       | 0.52 | 0.73 | 0.35 | 0.22 | 0.46 | 0.06  | 0.12 | 0.43 | 0.47 | 1.16  | 0.12  | 0.19 | 0.29 | 0.20 | 0.39\ | 0.44 |
| 57 |         | 2-METHYL-4-HEPTANONE                             | 0.22 | 0.38 | 0.51 | 0.47 | 0.85 | 0.39  | 0.46 | 0.44 | 0.36 | 1.04  | nd    | nd   | 0.36 | nd   | nd    | nd   |
| 58 |         | 3-METHYL-4-HEPTANONE                             | nd   | 0.31 | nd   | 0.87 | 0.46 | 0.29  | 0.15 | 0.20 | nd   | nd    | nd    | 0.12 | nd   | 0.28 | nd    | nd   |
| 59 |         | Pinacolone                                       | nd   | 0.31 | nd   | nd   | nd   | nd    | nd   | 0.19 | 0.09 | nd    | nd    | nd   | nd   | nd   | nd    | nd   |
| 60 |         | 2,3-Pentanedione                                 | nd   | 0.18 | nd   | 0.17 | nd   | nd    | 0.07 | nd   | nd   | 0.20  | nd    | nd   | nd   | nd   | nd    | nd   |
| 61 |         | 2-oxobutyl acetate                               | nd   | nd   | nd   | nd   | 0.12 | nd    | 0.05 | 0.11 | nd   | 0.17  | nd    | nd   | nd   | 0.24 | nd    | nd   |
| 62 |         | 2,2,4-TRIMETHYL-3-PENTANONE                      | nd   | nd   | nd   | nd   | nd   | nd    | 0.35 | nd   | 0.04 | 0.46\ | nd    | 0.21 | nd   | nd   | nd    | nd   |
| 63 |         | 2-Propanone, 1-mercapto-                         | nd   | nd   | nd   | nd   | nd   | nd    | nd   | nd   | nd   | 42.78 | 66.28 | 1.48 | 5.94 | 8.80 | 25.8  | 20.8 |
| 64 |         | 2,2-DIMETHYL-3-HEXANONE                          | nd   | nd   | 0.33 | 0.31 | 0.30 | nd    | nd   | 0.50 | 0.89 | 0.79  | nd    | nd   | nd   | nd   | nd    | nd   |
| 65 |         | 2-METHYL-3-PENTANONE                             | nd   | nd   | 0.20 | nd   | nd   | nd    | nd   | nd   | nd   | 0.17  | nd    | nd   | nd   | 0.07 | nd    | nd   |
| 66 |         | Methyl vinyl ketone                              | nd   | nd   | 0.47 | 0.23 | nd   | nd    | nd   | nd   | 1.56 | nd    | nd    | nd   | nd   | nd   | nd    | nd   |
| 67 |         | 2-Heptanone                                      | nd   | nd   | 1.55 | nd   | nd   | nd    | nd   | nd   | nd   | nd    | nd    | nd   | nd   | nd   | nd    | nd   |
| 68 |         | 5-METHYL-3-HEXEN-2-ONE                           | nd   | nd   | 0.32 | nd   | nd   | nd    | nd   | nd   | nd   | nd    | nd    | nd   | nd   | nd   | nd    | nd   |
| 69 |         | 1,1,1-Trifluoroacetone                           | nd   | nd   | 0.08 | nd   | 0.06 | nd    | nd   | nd   | nd   | nd    | nd    | nd   | nd   | nd   | nd    | nd   |
| 70 |         | 2,4-DIMETHYL-3-HEPTANONE                         | nd   | nd   | nd   | nd   | nd   | nd    | nd   | 0.14 | nd   | nd    | nd    | nd   | nd   | nd   | nd    | nd   |
| 71 |         | 2,5-DIMETHYL-3-HEXANONE                          | nd   | nd   | nd   | 0.91 | nd   | nd    | nd   | nd   | 1.23 | nd    | nd    | nd   | 0.36 | 0.14 | nd    | nd   |
| 72 |         | 3,4-Hexanedione                                  | nd   | nd   | nd   | nd   | nd   | nd    | nd   | nd   | 6.17 | nd    | 0.18  | nd   | nd   | nd   | nd    | nd   |
| 73 |         | 2'-FLUORO-6'-                                    | nd   | nd   | nd   | nd   | nd   | nd    | nd   | nd   | 0.03 | nd    | nd    | nd   | nd   | nd   | nd    | 12.2 |
| 74 |         | 3-Pentanone                                      | nd   | nd   | nd   | nd   | nd   | 0.14  | nd   | nd   | nd   | 0.15  | 0.24  | nd   | nd   | 0.08 | 0.14  | 0.13 |
| 75 |         | 2-Nonanone                                       | nd   | nd   | nd   | nd   | 3.92 | 6.46  | nd   | nd   | nd   | nd    | nd    | nd   | nd   | nd   | nd    | nd   |
| 76 |         | 4-Heptanone                                      | nd   | nd   | nd   | nd   | nd   | 17.13 | nd   | nd   | nd   | nd    | nd    | nd   | nd   | nd   | nd    | nd   |
| 77 |         | 3-METHYL-1-PHENYL-2-BUTANONE                     | nd   | nd   | nd   | nd   | nd   | 0.29  | nd   | nd   | nd   | nd    | nd    | nd   | nd   | nd   | nd    | nd   |
| 78 |         | 2-Octanone                                       | nd   | nd   | nd   | nd   | nd   | 3.83  | nd   | nd   | nd   | nd    | nd    | nd   | nd   | nd   | nd    | nd   |
| 79 |         | 3-METHYL-2-PENTANONE                             | nd   | nd   | nd   | nd   | nd   | nd    | nd   | nd   | nd   | nd    | 0.94  | nd   | nd   | nd   | nd    | nd   |
| 80 |         | Tetrahydro-4,4,6-trimethyl-2H-pyran-2-one        | nd   | nd   | nd   | nd   | nd   | nd    | nd   | nd   | nd   | 1.04  | nd    | nd   | nd   | nd   | nd    | nd   |
| 81 |         | 1-Phenyl-3-[2-(phenylmethoxy)phenyl]-1-propanone | nd   | nd   | nd   | nd   | 0.42 | 0.84  | nd   | 0.54 | nd   | 0.87  | nd    | nd   | nd   | nd   | nd    | nd   |
| 82 |         | 2-Chloro-1-(4-ethylphenyl)-2-methyl-1-propanone  | nd   | nd   | nd   | nd   | nd   | nd    | nd   | nd   | nd   | nd    | nd    | nd   | 1.77 | nd   | nd    | 0.17 |

|     |        |                                                 |      |      |      |      |      |      |      |      |      |      |      |      |      |      |      |      |
|-----|--------|-------------------------------------------------|------|------|------|------|------|------|------|------|------|------|------|------|------|------|------|------|
| 83  |        | 2,4-Dimethyl-1-penten-3-one                     | nd   | nd   | nd   | nd   | nd   | 0.23 | nd   |
| 84  |        | 2,4-DIMETHYL-3-HEXANONE                         | nd   | nd   | nd   | nd   | 0.47 | nd   | nd   | nd   | 0.31 | nd   |
| 85  |        | 3,4-DIMETHYL-2-HEXANONE                         | nd   | nd   | nd   | nd   | 3.40 | nd   |
| 86  |        | 3,4-Epoxy-2-hexanone                            | nd   | 0.11 | nd   | nd   | nd   | nd   | nd   | 0.11 | nd   | nd   |
| 87  |        | 3,5-Heptanedione, 4-ethyl-2,2,6,6-tetramethyl-  | nd   | nd   | nd   | nd   | 0.64 | nd   |
| 88  |        | 9-Phenyl-7-oxabicyclo[4.2.1]nona-2,4-dien-8-one | nd   | nd   | nd   | nd   | 0.24 | nd   |
| 89  |        | 2-Butanone,1-(acetyloxy)-                       | nd   | nd   | nd   | nd   | nd   | nd   | 0.07 | nd   |
| 90  |        | Hexafluoroacetone                               | nd   | 0.28 |
| 91  | Esters | ALLYL ACRYLATE                                  | 1.01 | nd   |
| 92  |        | VINYL ACRYLATE                                  | 0.54 | nd   | 0.17 | nd   | nd   | 0.49 | nd   |
| 93  |        | 1H,1H-PERFLUOROOCYL ACRYLATE                    | 0.11 | nd   |
| 94  |        | CIS-3-HEXENYL PROPIONATE                        | 0.56 | nd   | nd   | nd   | nd   | 0.34 | nd   |
| 95  |        | Dimethylbenzylcarbonyl acetate                  | 1.11 | nd   | nd   | nd   | nd   | 2.14 | nd   |
| 96  |        | METHYL ACETOPYRUVATE                            | 0.68 | nd   |
| 97  |        | FEMA 2860                                       | nd   | 0.46 | nd   |
| 98  |        | VINYL PROPIONATE                                | nd   | 0.13 | nd   | 0.38 | 0.11 | nd   | 0.11 | nd   | nd   | nd   | 0.07 | 0.03 | nd   | nd   | 0.18 | nd   |
| 99  |        | methyl 5-oxotetrahydrofuran-2-carboxylate       | nd   | 0.13 | nd   | 2.81 |
| 100 |        | TETRAHYDROFURFURYL BUTYRATE                     | nd   | 1.66 | 0.25 | nd   | nd   | nd   | 0.51 | 0.57 | 0.34 | 0.57 | nd   | 0.04 | 0.99 | 1.04 | 0.63 | nd   |
| 101 |        | Diethyl 2,2-difluoromalonate                    | nd   | 0.04 | nd   |
| 102 |        | Dibutyl oxalate                                 | nd   | 0.26 | nd   | 0.28 | 0.40 | nd   | nd   |
| 103 |        | Methyl dimethoxyacetate                         | nd   | 0.18 | nd   |
| 104 |        | 1,3-DINITROGLYCERIN                             | nd   | nd   | nd   | nd   | nd   | nd   | 1.04 | nd   |
| 105 |        | Butyl butyryllactate                            | nd   | nd   | nd   | nd   | 0.13 | nd   | 0.03 | nd   | nd   | nd   | nd   | nd   | nd   | 0.12 | nd   | nd   |
| 106 |        | Trimethoxymethane                               | nd   | nd   | nd   | nd   | nd   | nd   | 0.17 | nd   | 0.50 | 0.34 | 0.55 | nd   | nd   | nd   | nd   | nd   |
| 107 |        | Methyl formate                                  | nd   | 0.47 | nd   | nd   | nd   | nd   |
| 108 |        | Ethyl carbazate                                 | nd   | 1.08 | nd   | nd   | nd   | 0.33 | nd   | nd   | nd   | 0.04 |
| 109 |        | 2-IODOOCTANE                                    | nd   | nd   | 0.13 | nd   | 0.11 | nd   |
| 110 |        | Ethyl 2-hydroxyisobutyrate                      | nd   | nd   | 0.14 | 0.09 | 0.21 | nd   | nd   | nd   | 0.09 | nd   |
| 111 |        | CIS-3-HEXENYL PROPIONATE                        | nd   | nd   | 0.79 | 0.35 | nd   | nd   | nd   | nd   | nd   | nd   | 0.91 | nd   | nd   | nd   | nd   | 0.36 |

|     |                                 |    |    |      |      |      |      |    |      |      |       |       |    |      |      |      |    |
|-----|---------------------------------|----|----|------|------|------|------|----|------|------|-------|-------|----|------|------|------|----|
| 112 | Methyl DL-mandelate             | nd | nd | 0.14 | nd   | nd   | nd   | nd | nd   | nd   | nd    | nd    | nd | nd   | nd   | nd   | nd |
| 113 | Ethyl pyruvate                  | nd | nd | nd   | nd   | nd   | nd   | nd | 0.10 | nd   | nd    | nd    | nd | nd   | nd   | nd   | nd |
| 114 | cis-3-Hexenyl 2-methylbutanoate | nd | nd | nd   | nd   | nd   | nd   | nd | 1.06 | 0.89 | nd    | nd    | nd | nd   | 0.83 | nd   | nd |
| 115 | HEXANES                         | nd | nd | nd   | nd   | nd   | nd   | nd | nd   | nd   | nd    | nd    | nd | 0.45 | nd   | nd   | nd |
| 116 | PENTAFLUOROBENZYL               | P- | nd | nd   | nd   | nd   | nd   | nd | nd   | nd   | nd    | nd    | nd | 0.49 | nd   | nd   | nd |
| 117 | 2-oxetanone                     | nd | nd | nd   | 0.02 | nd   | 0.05 | nd | nd   | nd   | nd    | nd    | nd | nd   | nd   | nd   | nd |
| 118 | Permethrin                      | nd | nd | nd   | 0.40 | nd   | nd   | nd | nd   | nd   | nd    | nd    | nd | nd   | nd   | nd   | nd |
| 119 | Propylene carbonate             | nd | nd | nd   | 0.04 | nd   | nd   | nd | nd   | nd   | nd    | nd    | nd | nd   | nd   | nd   | nd |
| 120 | LINALYL FORMATE                 | nd | nd | nd   | nd   | nd   | nd   | nd | nd   | 2.51 | 1.10  | nd    | nd | nd   | 0.99 | nd   | nd |
| 121 | Ethylene glycol diacetate       | nd | nd | nd   | nd   | nd   | nd   | nd | nd   | 0.15 | nd    | nd    | nd | nd   | nd   | nd   | nd |
| 122 | ISOPROPYL PROPIONATE            | nd | nd | nd   | nd   | nd   | nd   | nd | nd   | nd   | nd    | nd    | nd | nd   | 0.28 | nd   | nd |
| 123 | TETRAHYDROFURFURYL ACETATE      | nd | nd | nd   | nd   | 0.08 | nd   | nd | nd   | nd   | nd    | nd    | nd | nd   | nd   | nd   | nd |
| 124 | Ethyl acetate                   | nd | nd | nd   | nd   | nd   | nd   | nd | nd   | nd   | 16.92 | 716.2 | nd | nd   | nd   | nd   | nd |
| 125 | Ethyl isobutyrate               | nd | nd | nd   | nd   | nd   | nd   | nd | nd   | nd   | 49.50 | 31.43 | nd | nd   | nd   | nd   | nd |
| 126 | Methyl isovalerate              | nd | nd | nd   | nd   | nd   | nd   | nd | nd   | nd   | 9.31  | 6.79  | nd | nd   | nd   | nd   | nd |
| 127 | Ethyl butyrate                  | nd | nd | nd   | nd   | nd   | nd   | nd | nd   | nd   | 5.52  | 4.08  | nd | nd   | nd   | nd   | nd |
| 128 | Ethyl 2-methylbutyrate          | nd | nd | nd   | nd   | nd   | nd   | nd | nd   | nd   | 7.60  | 5.28  | nd | nd   | nd   | nd   | nd |
| 129 | Ethyl isovalerate               | nd | nd | nd   | nd   | nd   | nd   | nd | nd   | nd   | 17.50 | 15.86 | nd | nd   | nd   | nd   | nd |
| 130 | Isoamyl acetate                 | nd | nd | nd   | nd   | nd   | nd   | nd | nd   | nd   | 3.25  | 10.95 | nd | nd   | nd   | nd   | nd |
| 131 | Isobutyl isobutyrate            | nd | nd | nd   | nd   | nd   | nd   | nd | nd   | nd   | 0.37  | nd    | nd | nd   | nd   | nd   | nd |
| 132 | Ethyl 3-methylvalerate          | nd | nd | nd   | nd   | nd   | nd   | nd | nd   | nd   | 0.59  | nd    | nd | nd   | nd   | nd   | nd |
| 133 | Tetramethoxymethane             | nd | nd | nd   | nd   | nd   | nd   | nd | nd   | nd   | nd    | nd    | nd | nd   | nd   | 0.05 | nd |
| 134 | Diethyl carbonate               | nd | nd | nd   | nd   | nd   | nd   | nd | nd   | nd   | nd    | nd    | nd | nd   | nd   | 0.30 | nd |
| 135 | 4-tert-Butylcyclohexyl acetate  | nd | nd | nd   | nd   | nd   | nd   | nd | nd   | nd   | nd    | nd    | nd | nd   | nd   | 1.46 | nd |
| 136 | PROPYL FORMATE                  | nd | nd | nd   | nd   | nd   | 0.02 | nd | nd   | nd   | nd    | nd    | nd | nd   | nd   | nd   | nd |
| 137 | Ethyl caprylate                 | nd | nd | nd   | nd   | nd   | nd   | nd | nd   | nd   | nd    | 2.75  | nd | nd   | nd   | nd   | nd |
| 138 | Ethyl L(-)-lactate              | nd | nd | nd   | nd   | nd   | nd   | nd | nd   | nd   | nd    | 0.12  | nd | nd   | nd   | nd   | nd |
| 139 | DIALLYL CARBONATE               | nd | nd | nd   | nd   | nd   | nd   | nd | nd   | nd   | nd    | 0.20  | nd | nd   | nd   | nd   | nd |
| 140 | Tripropionin                    | nd | nd | nd   | nd   | nd   | nd   | nd | nd   | nd   | nd    | 0.17  | nd | nd   | nd   | nd   | nd |





|     |           |                                                  |       |      |      |       |      |      |      |      |      |      |      |       |      |      |      |      |
|-----|-----------|--------------------------------------------------|-------|------|------|-------|------|------|------|------|------|------|------|-------|------|------|------|------|
| 199 | Aldehydes | TRANS-2-HEXENAL                                  | 2.46  | nd   | nd   | nd    | nd   | nd   | nd   | nd   | nd   | nd   | nd   | nd    | nd   | nd   | nd   | nd   |
| 200 |           | Decanal                                          | 4.59  | nd   | nd   | nd    | nd   | nd   | nd   | nd   | nd   | nd   | nd   | nd    | nd   | nd   | nd   | nd   |
| 201 |           | 2-ETHYLHEXANAL                                   | 0.66  | nd   | nd   | nd    | nd   | nd   | nd   | nd   | nd   | nd   | nd   | nd    | nd   | nd   | nd   | nd   |
| 202 |           | s-Trioxane                                       | 1.10  | nd   | nd   | 0.88  | 1.18 | 0.24 | nd   | nd   | 1.01 | 1.00 | 0.26 | 0.16  | nd   | 0.94 | 0.74 | 0.53 |
| 203 |           | GLYCOLALDEHYDE                                   | nd    | 0.07 | nd   | nd    | nd   | nd   | 0.37 | nd   | nd   | nd   | nd   | 0.06  | 0.04 | nd   | nd   | 10.5 |
| 204 |           | 5-Norbornene-2-carboxaldehyde                    | nd    | 0.19 | nd   | nd    | nd   | nd   | nd   | nd   | nd   | nd   | nd   | nd    | nd   | nd   | nd   | nd   |
| 205 |           | METHOXYACETALDEHYDE                              | nd    | nd   | nd   | nd    | nd   | nd   | nd   | 0.12 | nd   | nd   | nd   | nd    | nd   | nd   | nd   | nd   |
| 206 |           | Trimethylacetaldehyde                            | nd    | nd   | nd   | 0.24  | nd    | nd   | nd   | nd   | nd   |
| 207 |           | 2,4-Dimethylbenzaldehyde                         | nd    | nd   | nd   | 42.42 | nd    | nd   | nd   | nd   | nd   |
| 208 |           | 1-Nonanal                                        | nd    | nd   | nd   | nd    | 3.64 | nd   | nd   | nd   | 2.14 | nd   | nd   | nd    | nd   | nd   | nd   | nd   |
| 209 |           | 2,5-Dimethylbenzaldehyde                         | nd    | nd   | nd   | nd    | 1.53 | nd   | nd   | nd   | 1.51 | nd   | nd   | nd    | nd   | nd   | nd   | nd   |
| 210 |           | Methylglyoxal                                    | nd    | nd   | nd   | nd    | 0.05 | nd    | nd   | nd   | nd   | nd   |
| 211 |           | 4-PHENYLBUTANAL                                  | nd    | nd   | nd   | nd    | nd   | 0.41 | nd   | nd   | nd   | 0.10 | nd   | nd    | nd   | nd   | nd   | nd   |
| 212 |           | Glyoxal                                          | nd    | nd   | nd   | nd    | nd   | nd   | nd   | nd   | nd   | nd   | 1.61 | nd    | nd   | nd   | nd   | nd   |
| 213 |           | Glycerol formal                                  | nd    | nd   | nd   | nd    | nd   | nd   | nd   | nd   | nd   | nd   | 3.54 | nd    | nd   | nd   | nd   | nd   |
| 214 |           | 4-BENZYLOXY-3-METHOXY-2-                         | nd    | nd   | nd   | nd    | nd   | nd   | nd   | nd   | nd   | nd   | 1.13 | nd    | nd   | nd   | nd   | nd   |
| 215 |           | PROPARGYLALDEHYDE DIETHYL ACETAL                 | nd    | nd   | nd   | nd    | nd   | nd   | nd   | nd   | nd   | nd   | 0.25 | nd    | nd   | nd   | nd   | nd   |
| 216 |           | 2-Methoxy-3,6-dimethyl-4-(benzyloxy)benzaldehyde | 0.61  | nd   | nd   | nd    | 0.07 | nd   | nd   | nd   | nd   | 0.04 | nd   | nd    | nd   | nd   | nd   | nd   |
| 217 |           | 2,4-Bis[(trimethylsilyloxy]benzaldehyde          | 0.61  | 0.55 | 0.33 | 0.73  | 0.58 | 0.61 | 0.50 | 0.46 | 0.51 | nd   | nd   | 0.41  | 0.86 | 0.54 | 0.62 | 0.50 |
| 218 |           | Benzaldehyde, 2,5-bis[(trimethylsilyloxy]-       | nd    | nd   | nd   | nd    | nd   | nd   | 0.46 | nd   | nd   | nd   | nd   | nd    | nd   | nd   | nd   | nd   |
| 219 |           | Dimethoxymethane                                 | nd    | nd   | nd   | nd    | nd   | nd   | nd   | nd   | nd   | nd   | 0.76 | nd    | nd   | nd   | nd   | nd   |
| 220 | Alkanes   | 1,3-DIOXANE                                      | 0.41  | nd   | nd   | nd    | nd   | nd   | nd   | nd   | nd   | nd   | nd   | nd    | nd   | nd   | nd   | nd   |
| 221 |           | 1-Iodononane                                     | 0.55  | nd   | 0.55 | 0.45  | 0.60 | nd   | 0.35 | 0.98 | 0.92 | 0.43 | nd   | 0.52  | nd   | 0.83 | nd   | nd   |
| 222 |           | Dimethyldimethoxysilane                          | 0.22  | nd   | nd   | 0.50  | nd   | nd   | 0.30 | 0.24 | nd   | nd   | nd   | nd    | nd   | 0.22 | nd   | nd   |
| 223 |           | Ethoxydimethylvinylsilane                        | 64.19 | nd   | nd   | nd    | nd   | nd   | nd   | nd   | nd   | nd   | nd   | nd    | nd   | nd   | nd   | nd   |
| 224 |           | 1-Bromo-2-methylpropane                          | nd    | nd   | nd   | nd    | nd   | nd   | nd   | nd   | nd   | nd   | nd   | nd    | nd   | nd   | nd   | nd   |
| 225 |           | 1-BROMO-3-(1,3-DIOXOLAN-2-YL)-4-                 | nd    | 5.03 | 1.81 | nd    | nd   | nd   | 8.86 | 3.59 | nd   | nd   | nd   | 10.79 | 13.5 | 2.71 | 3.37 | 5.06 |
| 226 |           | 2,2-Dimethylpentane                              | nd    | 0.38 | nd   | nd    | nd   | nd   | nd   | nd   | nd   | nd   | nd   | nd    | nd   | nd   | nd   | nd   |
| 227 |           | 2,2-Dimethylbutane                               | nd    | nd   | nd   | nd    | nd   | nd   | nd   | 0.33 | nd   | nd   | nd   | nd    | 0.23 | nd   | nd   | nd   |



|     |                                     |    |      |      |      |      |      |      |      |      |      |      |      |      |      |      |      |
|-----|-------------------------------------|----|------|------|------|------|------|------|------|------|------|------|------|------|------|------|------|
| 228 | Cyclohexyldimethoxymethylsilane     | nd | 1.03 | 0.51 | nd   | 1.04 | nd   | nd   | 1.03 | 0.88 | 1.00 | nd   | 1.10 | 0.59 | 0.67 | nd   | nd   |
| 229 | 3,5-DIMETHYL-4-OCTANONE             | nd | 0.07 | nd   | nd   | 0.54 | nd   | nd   | nd   | 0.90 | 0.51 | nd   | nd   | nd   | nd   | nd   | nd   |
| 230 | 2,2-DIMETHYLHEXANE                  | nd | 0.31 | nd   |
| 231 | 2,3,4-TRIMETHYLHEXANE               | nd | 0.84 | nd   |
| 232 | 2,2,4-trimethylpentane              | nd | nd   | nd   | nd   | 0.48 | nd   | 0.35 | 0.36 | 0.40 | 0.65 | 0.89 | 0.31 | nd   | nd   | nd   | nd   |
| 233 | 3-ETHYL-3-METHYLHEPTANE             | nd | nd   | 2.63 | nd   | 1.54 | nd   | 2.12 | 2.53 | 1.68 | 1.25 | nd   | 1.45 | 3.16 | nd   | nd   | nd   |
| 234 | Propylene oxide                     | nd | nd   | nd   | nd   | nd   | nd   | 0.10 | nd   |
| 235 | 2,2,5-TRIMETHYLHEXANE               | nd | nd   | nd   | nd   | nd   | nd   | nd   | nd   | nd   | nd   | nd   | 0.65 | nd   | nd   | nd   | nd   |
| 236 | 1-IODODECANE                        | nd | nd   | nd   | 0.32 | 0.35 | nd   | nd   | nd   | 0.34 | nd   | nd   | 0.32 | nd   | nd   | nd   | nd   |
| 237 | 2,2,3-TRIMETHYLBUTANE               | nd | nd   | 1.07 | nd   |
| 238 | 2,2,3-TRIMETHYLPENTANE              | nd | nd   | nd   | nd   | nd   | nd   | nd   | 0.28 | nd   |
| 239 | 3,3-DIMETHYLHEXANE                  | nd | nd   | 1.66 | 1.08 | nd   | nd   | nd   | nd   | nd   | 0.19 | nd   | nd   | nd   | nd   | nd   | nd   |
| 240 | 1-CHLOROUNDECANE                    | nd | nd   | 1.67 | nd   |
| 241 | Methylcyclotrisiloxane              | nd | nd   | nd   | nd   | nd   | nd   | nd   | 7.76 | nd   |
| 242 | 2-Bromomethyl-1,3-dioxolane         | nd | nd   | nd   | nd   | nd   | nd   | nd   | 0.27 | nd   |
| 243 | 2,2-DIMETHYLPROPANE                 | nd | nd   | nd   | 0.13 | nd   |
| 244 | 2-Methyl-2-nitropropane             | nd | nd   | nd   | 0.09 | nd   |
| 245 | 1-Iodododecane                      | nd | nd   | nd   | 0.67 | nd   |
| 246 | 2-METHOXY-1,3-DIOXOLANE             | nd | nd   | nd   | nd   | nd   | nd   | nd   | nd   | 3.31 | nd   |
| 247 | 3,3-DIMETHYLOCTANE                  | nd | nd   | nd   | nd   | nd   | nd   | nd   | nd   | 0.94 | nd   |
| 248 | 2-(2-Bromoethyl)-1,3-dioxolane      | nd | nd   | nd   | nd   | nd   | nd   | nd   | nd   | nd   | nd   | nd   | nd   | nd   | 0.33 | nd   | nd   |
| 249 | (S)-(+)-1-Benzyl-3-aminopyrrolidine | nd | nd   | nd   | nd   | 0.75 | nd   |
| 250 | 2-Bromobutane                       | nd | nd   | nd   | nd   | 0.09 | nd   |
| 251 | (S)-(-)-Propylene oxide             | nd | nd   | nd   | nd   | 0.23 | nd   |
| 252 | 1-(2-Chloroethoxy)-1-ethoxyethane   | nd | nd   | nd   | nd   | nd   | nd   | nd   | nd   | nd   | nd   | nd   | nd   | nd   | nd   | 0.38 | nd   |
| 253 | Carbon tetrafluoride                | nd | nd   | nd   | nd   | nd   | 0.18 | nd   |
| 254 | Tetraoxane                          | nd | nd   | nd   | nd   | nd   | nd   | nd   | nd   | nd   | nd   | nd   | nd   | nd   | nd   | nd   | 0.54 |
| 255 | 1-Iodotridecane                     | nd | nd   | nd   | nd   | nd   | 0.31 | nd   |
| 256 | 1-(1-Methylpropoxy)butane           | nd | nd   | nd   | nd   | nd   | nd   | nd   | nd   | nd   | nd   | 0.57 | nd   | nd   | nd   | nd   | nd   |

|     |                                            |      |      |      |      |      |      |      |      |      |      |      |      |      |      |      |      |
|-----|--------------------------------------------|------|------|------|------|------|------|------|------|------|------|------|------|------|------|------|------|
| 257 | 2-HYDROXYMETHYL-1,3-DIOXOLANE              | 0.36 | nd   | 0.07 | 0.08 | nd   | 0.33 | 0.60 | 0.51 | 0.36 | 0.13 | 0.14 | 0.32 | 0.23 | 0.33 | 0.43 | 0.48 |
| 258 | 2-methyl-6-ethyloctane                     | nd   | nd   | nd   | nd   | 0.90 | nd   | 0.71 | nd   | nd   |
| 259 | 2,4,5-trimethyl-1,3-dioxolane              | nd   | 1.37 | nd   | nd   | nd   | nd   | nd   |
| 260 | (3,3-Difluoroallyl)trimethylsilane         | nd   | nd   | nd   | nd   | 0.27 | nd   |
| 261 | 3,6-DIMETHYLOCTANE                         | nd   | 0.60 | nd   |
| 262 | (S)-(+)-4-METHYL-1-HEXANOL                 | nd   | 0.78 | nd   | nd   | nd   | nd   | nd   | 0.34 | nd   |
| 263 | 5-(2-Methylpropyl)nonane                   | nd   | 1.48 | 0.90 | nd   | nd   | nd   | 1.32 | 1.49 | 1.66 | nd   | nd   | nd   | nd   | 1.30 | nd   | nd   |
| 264 | DICYCLOPROPYLMETHANE                       | nd   | 0.17 | nd   | nd   | nd   | nd   |
| 265 | 3,3,5-Trimethyldecane                      | nd   | 0.85 | nd   | nd   | nd   | nd   | 0.57 | nd   | nd   | nd   |
| 266 | 3,8-Dimethylundecane                       | nd   | 3.40 | 1.88 | 2.03 | 1.54 | nd   | nd   | 1.42 | 1.96 | 1.13 | nd   | 1.91 | 1.25 | 1.40 | nd   | nd   |
| 267 | 1 $\alpha$ ,3 $\beta$ -Diphenylcyclobutane | nd   | 0.37 | nd   |
| 268 | 1-(chloromethoxy)-2-methylpropane          | nd   | nd   | nd   | nd   | nd   | 0.05 | nd   |
| 269 | 2,2,5,5-TETRAMETHYLHEXANE                  | nd   | nd   | nd   | nd   | 0.53 | nd   |
| 270 | 2,2,9-Trimethyldecane                      | nd   | nd   | 1.15 | nd   |
| 271 | 2,3,6-trimethyloctane                      | nd   | nd   | nd   | 1.95 | 2.12 | nd   |
| 272 | 2,4,4-TRIMETHYLHEXANE                      | nd   | 0.74 | 1.02 | 1.09 | 0.75 | nd   | 1.43 | 0.60 | 1.25 | nd   | 0.29 | 1.31 | 1.68 | 0.19 | 0.11 | nd   |
| 273 | 2,4,6-trimethyloctane                      | nd   | 0.74 | nd   | 0.67 | nd   | nd   | nd   | nd   |
| 274 | 2,5,5-Trimethylheptane.                    | nd   | 0.43 | 2.63 | nd   | 0.16 | 0.11 | nd   | nd   | 1.02 | nd   | nd   | 0.82 | nd   | nd   | nd   | nd   |
| 275 | 2,6,6-trimethyloctane                      | nd   | nd   | 0.77 | nd   | nd   | nd   | nd   | nd   | 0.71 | nd   |
| 276 | 3-Ethyl-3-methyldecane                     | nd   | 0.69 | nd   | 0.90 | 0.77 | nd   | nd   | nd   | 0.86 | 0.64 | nd   | nd   | nd   | nd   | nd   | nd   |
| 277 | 3,3-Dimethyldiaziridine                    | nd   | nd   | nd   | nd   | nd   | 0.93 | nd   |
| 278 | 3,3,4-Trimethylheptane.                    | nd   | 1.53 | nd   | 1.36 | 0.64 | nd   | nd   | nd   | 0.24 | nd   | nd   | 0.48 | nd   | nd   | nd   | nd   |
| 279 | 3,3,5-TRIMETHYLHEPTANE                     | nd   | 0.64 | 0.60 | 0.44 | nd   | nd   | 0.65 | nd   | nd   | nd   | nd   | 0.04 | 0.44 | 0.25 | nd   | nd   |
| 280 | 3,4,5,6-tetramethyloctane                  | nd   | nd   | nd   | nd   | 1.30 | nd   |
| 281 | 3,7-dimethyldecane                         | nd   | 6.76 | 1.88 | 2.07 | 0.46 | 0.14 | 0.72 | 1.31 | 2.23 | 0.20 | nd   | 1.79 | 0.67 | nd   | nd   | nd   |
| 282 | 4,4-Dimethylundecane                       | nd   | 0.85 | nd   | nd   | nd   |
| 283 | 5-Methyl-5-propylnonane                    | 1.43 | 2.33 | 1.93 | 1.75 | 2.36 | 0.62 | 1.47 | 1.97 | 2.05 | 2.44 | 0.68 | 0.69 | nd   | 1.40 | 0.41 | 0.62 |
| 284 | AZO-TERT-BUTANE                            | nd   | 0.15 |

Arenes

|     |            |                                        |      |      |      |      |      |      |      |      |      |      |    |      |      |      |      |      |
|-----|------------|----------------------------------------|------|------|------|------|------|------|------|------|------|------|----|------|------|------|------|------|
| 285 |            | 3,5-DI-TERT-BUTYLPHENOL                | nd   | 0.97 | 0.40 | nd   | 0.49 | 0.28 | 0.88 | 1.18 | 0.40 | 0.79 | nd | 1.53 | nd   | 0.72 | 0.84 | 1.20 |
| 286 |            | m-Xylene                               | nd   | nd   | nd   | 3.22 | nd   | nd   | nd   | 0.46 | nd   | nd   | nd | 0.81 | nd   | 0.53 | nd   | 2.66 |
| 287 |            | P-XYLENE                               | 2.53 | 1.06 | 1.20 | 3.07 | 4.92 | 0.98 | 1.62 | 0.92 | 2.58 | 0.71 | nd | 0.92 | 1.95 | 1.17 | nd   | nd   |
| 288 |            | o-Xylene                               | nd   | 0.41 | nd   | nd   | 0.22 | nd   | nd   | nd   | nd   | nd   | nd | nd   | nd   | nd   | nd   | nd   |
| 289 |            | 2-Phenylindole                         | nd   | 0.38 | nd   | 0.18 | nd   | 0.36 | nd   | nd   | nd   | nd   | nd | nd   | nd   | nd   | nd   | nd   |
| 290 |            | 4,6-DI(TERT-BUTYL)BENZENE-1,3-DIOL     | nd   | 0.33 | nd   | 0.31 | nd   | nd   | nd   | nd   | nd   | 0.21 | nd | nd   | 0.57 | nd   | nd   | nd   |
| 291 |            | 2,4-Di-tert-butylphenol                | nd   | nd   | nd   | 2.88 | nd   | nd   | nd   | nd   | nd   | nd   | nd | 1.65 | nd   | nd   | nd   | nd   |
| 292 |            | Ethylbenzene                           | nd   | nd   | 0.34 | nd   | nd   | nd   | nd   | nd   | nd   | 1.15 | nd | nd   | nd   | nd   | nd   | nd   |
| 293 |            | 1,2-BIS(TRIMETHYLSILYL)BENZENE         | nd   | nd   | nd   | 0.72 | nd   | nd   | nd   | nd   | nd   | nd   | nd | nd   | nd   | nd   | nd   | nd   |
| 294 |            | 4-Butylphenol                          | nd   | nd   | nd   | 1.76 | nd   | 0.91 | nd   | nd   | nd   | nd   | nd | nd   | nd   | nd   | nd   | nd   |
| 295 | Anhydrides | 3,3-DIMETHYLGLUTARIC ANHYDRIDE         | 0.20 | nd   | nd | nd   | nd   | 0.54 | nd   | nd   |
| 296 |            | Isobutyric anhydride                   | nd   | 0.09 | 0.99 | nd   | 0.23 | 0.16 | 0.04 | nd   | 0.64 | 0.16 | nd | 0.26 | nd   | nd   | nd   | 0.40 |
| 297 |            | Propionic anhydride                    | nd   | 0.15 | 0.10 | 0.20 | nd   | nd   | 0.05 | nd   | nd   | 0.19 | nd | nd   | nd   | 0.05 | 0.13 | nd   |
| 298 |            | Butyric anhydride                      | nd   | 0.85 | nd   | nd   | 0.24 | nd   | nd   | nd   | nd   | nd   | nd | 0.52 | nd   | 1.54 | nd   | nd   |
| 299 |            | Diglycolic anhydride                   | nd   | nd   | nd   | nd   | nd   | nd   | 0.03 | nd   | nd   | nd   | nd | nd   | nd   | nd   | nd   | nd   |
| 300 |            | TRIMETHYLACETIC ANHYDRIDE              | nd   | nd   | 0.08 | nd   | nd | nd   | nd   | nd   | nd   | nd   |
| 301 |            | Diglycolic anhydride                   | nd   | nd   | nd   | 0.03 | nd   | nd   | nd   | nd   | nd   | nd   | nd | nd   | nd   | nd   | nd   | nd   |
| 302 |            | Methanesulfonic anhydride              | nd   | nd | nd   | nd   | nd   | 0.70 | nd   |
| 303 | Alkenes    | 3,5,5-TRIMETHYL-1-HEXENE               | nd   | nd | nd   | 1.21 | nd   | nd   | nd   |
| 304 |            | Cinene                                 | nd   | nd   | 2.34 | nd   | nd | nd   | nd   | nd   | nd   | nd   |
| 305 |            | Artemisia triene                       | nd   | nd   | 1.08 | nd   | nd | nd   | nd   | nd   | nd   | nd   |
| 306 |            | (Z)-8-Methyl-2-decene                  | nd   | nd   | 0.75 | nd   | nd | nd   | nd   | nd   | nd   | nd   |
| 307 |            | 1-(Aminoxy)-2-propene                  | nd   | nd   | nd   | nd   | 0.23 | nd   | nd   | nd   | nd   | nd   | nd | nd   | nd   | nd   | nd   | nd   |
| 308 |            | 1-Bromo-2,3,3-trifluoro-1-cyclopropene | nd   | nd | nd   | 0.61 | nd   | nd   | nd   |
| 309 |            | 2,3-Dimethyl-1,3-heptadiene            | nd   | nd   | nd   | nd   | 0.47 | nd   | nd   | nd   | nd   | nd   | nd | nd   | nd   | nd   | nd   | nd   |
| 310 |            | 3-METHYL-1,4,6-HEPTATRIENE             | nd   | nd   | nd   | 0.97 | nd   | nd   | nd   | nd   | 1.16 | nd   | nd | nd   | nd   | nd   | nd   | nd   |
| 311 |            | 8-Methyl-1-decene                      | nd   | nd   | 0.93 | nd   | nd | nd   | nd   | nd   | nd   | nd   |
| 312 |            | 3-BROMO-3,3-DIFLUOROPROPENE            | nd   | 0.13 | nd   | nd   | nd | nd   | nd   | nd   | nd   | nd   |
| 313 | Ethers     | Methoxyethene                          | 0.00 | nd   | nd   | 0.93 | nd   | nd   | nd   | nd   | nd   | nd   | nd | nd   | 0.95 | nd   | nd   | nd   |





|     |                            |    |    |    |      |      |    |    |    |    |      |    |    |    |      |    |    |
|-----|----------------------------|----|----|----|------|------|----|----|----|----|------|----|----|----|------|----|----|
| 372 | anti-2-Acetoxyacetaldoxime | nd | nd | nd | 0.16 | 0.10 | nd | nd | nd | nd | 0.13 | nd | nd | nd | 0.04 | nd | nd |
|-----|----------------------------|----|----|----|------|------|----|----|----|----|------|----|----|----|------|----|----|

3 **Fig. S1.** Changes in the total microbes (A), LAB (B), and fungi (C) counts during the  
 4 fermentation process of Sichuan pickle in COJ (white square with dotted line), IOJ  
 5 (grey triangle with dashed line), and CCJ (black round with solid line). Values are the  
 6 mean  $\pm$  SD from the experiments performed in triplicate, and significant difference is  
 7 analyzed by *t*-test: (ns)  $p > 0.05$ , (\*)  $p \leq 0.05$  and (\*\*)  $p \leq 0.01$ .

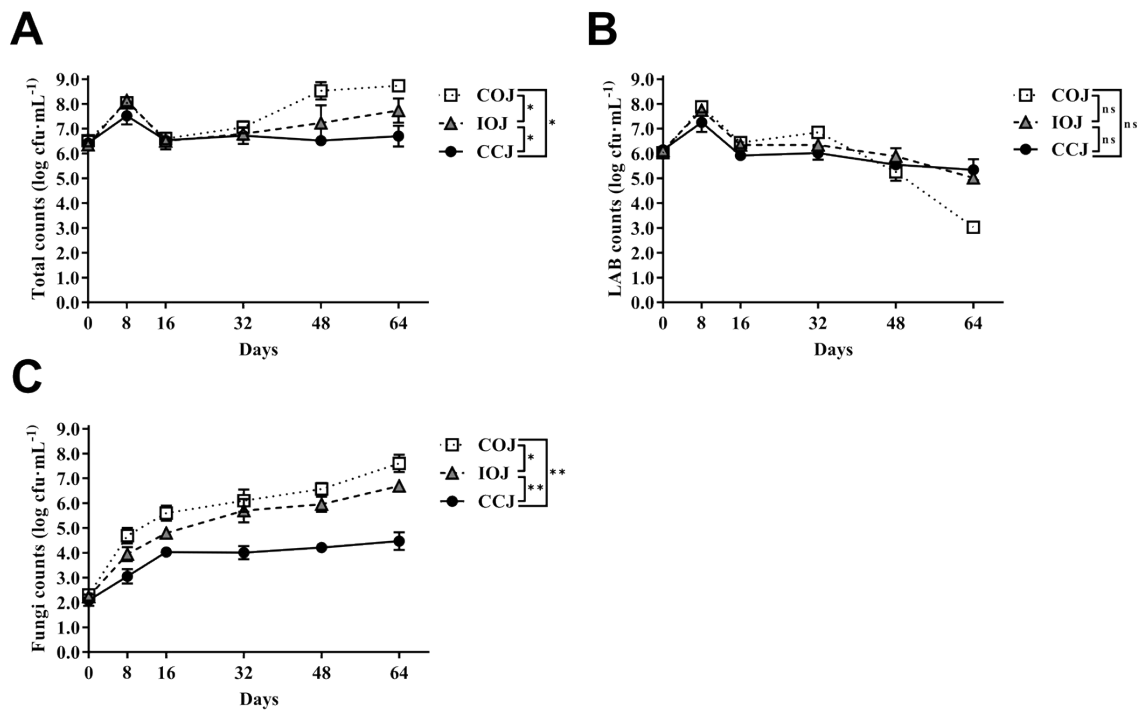

**Fig. S2.** Observed (A) and Shannon (B) curves of bacterial populations of Sichuan pickle samples in COJ and CCJ. Each line represents data from one sample.

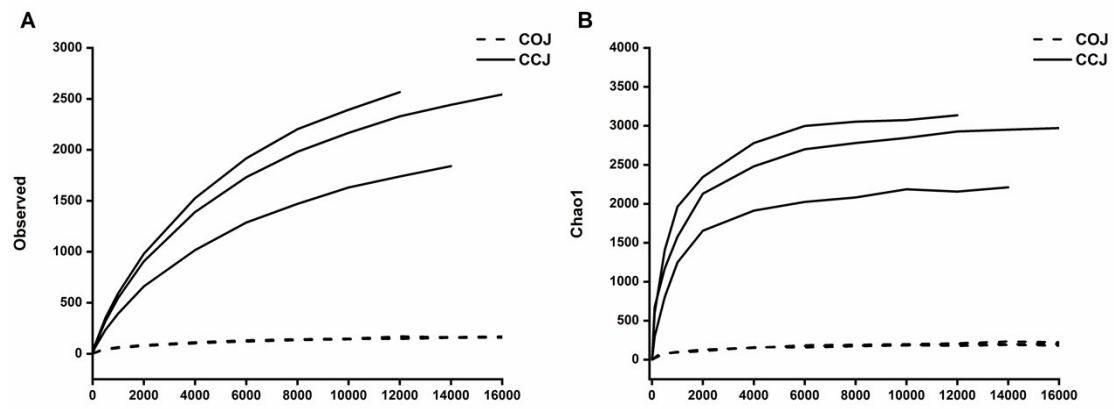



**Fig. S3** The bacterial compositions at genera level in CCJ on the 32<sup>nd</sup> day. The relative abundances of these genera are between 0.1% to 1.0%.

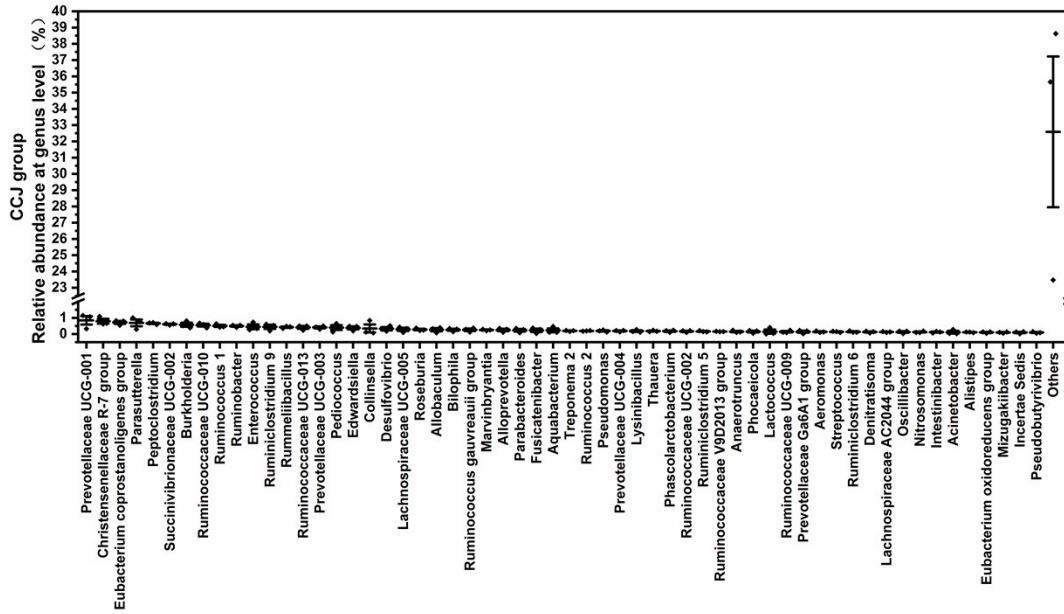

**Fig. S4.** Images representing different degrees of pellicle formation.

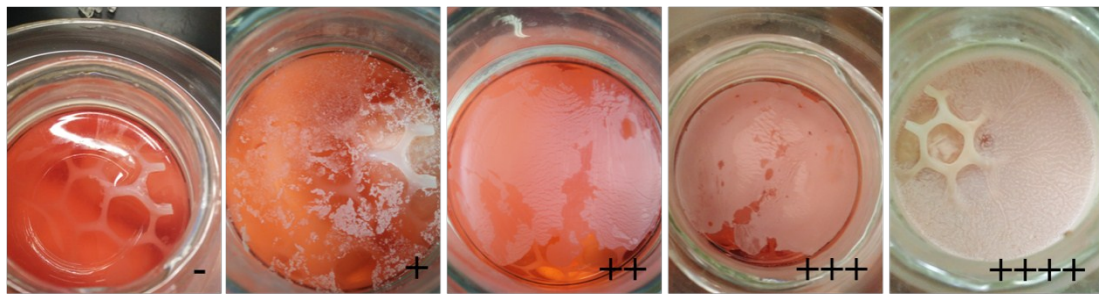

Supplement: RA-009-C9RA05994F-s001.pdf [file RA-009-C9RA05994F-s001.pdf]
